# Supplementary material
Source: publisher site journal article supplement (https://www.spandidos-publications.com/3027/downloadSupplementary)
Supplement: Supplementary file 1 [file downloadSupplementary]

Table SIV. A total of 572 target miRNAs of LAMC2 predicted by TargetScan Human 7.2.

| A, Conserved sites        |                     |            |                 |
|---------------------------|---------------------|------------|-----------------|
| miRNA                     | Position in the UTR | Seed match | Context++ score |
| hsa-miR-193a-3p           | 458-465             | 8mer       | -0.39           |
| hsa-miR-193b-3p           | 458-465             | 8mer       | -0.39           |
| hsa-miR-653-5p            | 770-776             | 7mer-1A    | -0.01           |
| hsa-miR-431-5p            | 1238-1244           | 7mer-m8    | -0.15           |
| B, Poorly conserved sites |                     |            |                 |
| miRNA                     | Position in the UTR | Seed match | Context++ score |
| hsa-miR-539-5p            | 15-21               | 7mer-1A    | -0.05           |
| hsa-miR-580-3p            | 16-22               | 7mer-1A    | -0.10           |
| hsa-miR-548b-3p           | 27-33               | 7mer-m8    | -0.02           |
| hsa-miR-6814-5p           | 31-37               | 7mer-1A    | -0.07           |
| hsa-miR-4733-5p           | 32-39               | 8mer       | -0.03           |
| hsa-miR-3713              | 35-41               | 7mer-1A    | -0.01           |
| hsa-miR-4742-3p           | 37-43               | 7mer-1A    | -0.01           |
| hsa-miR-4324              | 44-50               | 7mer-m8    | -0.04           |
| hsa-miR-125a-5p           | 45-51               | 7mer-m8    | -0.14           |
| hsa-miR-4319              | 45-51               | 7mer-m8    | -0.14           |
| hsa-miR-125b-5p           | 45-51               | 7mer-m8    | -0.14           |
| hsa-miR-7976              | 46-52               | 7mer-m8    | -0.12           |
| hsa-miR-6779-3p           | 47-53               | 7mer-m8    | -0.14           |
| hsa-miR-1233-3p           | 48-54               | 7mer-m8    | -0.11           |
| hsa-miR-615-3p            | 50-56               | 7mer-m8    | -0.33           |
| hsa-miR-4740-3p           | 52-58               | 7mer-1A    | -0.14           |
| hsa-miR-942-3p            | 59-65               | 7mer-m8    | -0.03           |
| hsa-miR-4717-3p           | 66-72               | 7mer-1A    | -0.07           |
| hsa-miR-1260b             | 76-82               | 7mer-m8    | -0.16           |
| hsa-miR-1260a             | 76-82               | 7mer-m8    | -0.16           |
| hsa-miR-1224-3p           | 76-82               | 7mer-1A    | -0.10           |
| hsa-miR-6834-3p           | 85-91               | 7mer-m8    | -0.20           |
| hsa-miR-105-5p            | 89-95               | 7mer-1A    | -0.01           |
| hsa-miR-7853-5p           | 89-95               | 7mer-1A    | -0.01           |
| hsa-miR-607               | 90-96               | 7mer-m8    | -0.02           |
| hsa-miR-3671              | 90-96               | 7mer-1A    | -0.01           |
| hsa-miR-660-5p            | 104-111             | 8mer       | -0.26           |
| hsa-miR-5591-3p           | 105-111             | 7mer-m8    | -0.13           |
| hsa-miR-631               | 116-122             | 7mer-1A    | -0.15           |

|                  |         |               |       |
|------------------|---------|---------------|-------|
| hsa-miR-3661     | 116-122 | 7mer-1A       | -0.08 |
| hsa-miR-192-5p   | 117-123 | 7mer-1A       | -0.08 |
| hsa-miR-215-5p   | 117-123 | 7mer-1A       | -0.08 |
| hsa-miR-223-3p   | 122-128 | 7mer-m8       | -0.05 |
| hsa-miR-7704     | 131-137 | 7mer-1A       | -0.17 |
| hsa-miR-615-5p   | 131-137 | 7mer-1A       | -0.09 |
| hsa-miR-6890-5p  | 132-138 | 7mer-m8       | -0.10 |
| hsa-miR-873-5p.1 | 138-144 | 7mer-1A       | -0.01 |
| hsa-miR-4772-5p  | 140-146 | 7mer-m8       | -0.16 |
| hsa-miR-769-3p   | 143-149 | 7mer-m8       | -0.23 |
| hsa-miR-450b-3p  | 143-149 | 7mer-m8       | -0.19 |
| hsa-miR-638      | 143-149 | 7mer-1A       | -0.23 |
| hsa-miR-4713-3p  | 143-149 | 7mer-1A       | -0.12 |
| hsa-miR-3187-3p  | 149-155 | 7mer-m8       | -0.03 |
| hsa-miR-4529-5p  | 149-155 | 7mer-1A       | -0.04 |
| hsa-miR-3190-5p  | 150-156 | 7mer-m8       | -0.07 |
| hsa-miR-6765-3p  | 153-159 | 7mer-m8       | -0.03 |
| hsa-miR-6776-3p  | 156-162 | 7mer-m8       | -0.06 |
| hsa-miR-641      | 162-168 | 7mer-1A       | -0.01 |
| hsa-miR-3617-5p  | 162-168 | 7mer-1A       | -0.01 |
| hsa-miR-6828-5p  | 184-190 | 7mer-m8       | -0.11 |
| hsa-miR-4422     | 186-198 | non-canonical | N/A   |
| hsa-miR-4422     | 186-198 | non-canonical | N/A   |
| hsa-miR-873-5p.1 | 187-193 | 7mer-1A       | -0.01 |
| hsa-miR-4711-5p  | 190-196 | 7mer-m8       | -0.16 |
| hsa-miR-338-3p   | 193-199 | 7mer-m8       | -0.02 |
| hsa-miR-4317     | 199-206 | 8mer          | -0.12 |
| hsa-miR-5001-3p  | 206-212 | 7mer-m8       | -0.15 |
| hsa-miR-4686     | 208-214 | 7mer-1A       | -0.09 |
| hsa-miR-1825     | 215-221 | 7mer-m8       | -0.17 |
| hsa-miR-4482-5p  | 217-223 | 7mer-m8       | -0.17 |
| hsa-miR-3130-5p  | 217-223 | 7mer-m8       | -0.14 |
| hsa-miR-500b-3p  | 218-224 | 7mer-m8       | -0.09 |
| hsa-miR-1228-3p  | 221-227 | 7mer-1A       | -0.09 |
| hsa-miR-342-3p   | 222-229 | 8mer          | -0.10 |
| hsa-miR-1229-3p  | 224-230 | 7mer-1A       | -0.03 |
| hsa-miR-382-3p   | 228-234 | 7mer-m8       | -0.03 |
| hsa-miR-500b-5p  | 235-241 | 7mer-m8       | -0.07 |

|                   |         |         |       |
|-------------------|---------|---------|-------|
| hsa-miR-362-5p    | 235-241 | 7mer-m8 | -0.07 |
| hsa-miR-488-5p    | 240-246 | 7mer-1A | -0.11 |
| hsa-miR-198       | 241-247 | 7mer-m8 | -0.05 |
| hsa-miR-615-5p    | 244-251 | 8mer    | -0.45 |
| hsa-miR-7704      | 245-251 | 7mer-1A | -0.16 |
| hsa-miR-5572      | 246-253 | 8mer    | -0.10 |
| hsa-miR-3170      | 246-252 | 7mer-1A | -0.11 |
| hsa-miR-6812-5p   | 246-252 | 7mer-1A | -0.10 |
| hsa-miR-6737-5p   | 246-252 | 7mer-1A | -0.09 |
| hsa-miR-6819-5p   | 246-252 | 7mer-1A | -0.08 |
| hsa-miR-6855-5p   | 246-252 | 7mer-1A | -0.06 |
| hsa-miR-450a-2-3p | 247-253 | 7mer-1A | -0.13 |
| hsa-miR-4260      | 247-253 | 7mer-1A | -0.07 |
| hsa-miR-9-5p      | 249-255 | 7mer-1A | -0.01 |
| hsa-miR-6844      | 250-256 | 7mer-1A | -0.01 |
| hsa-miR-26a-1-3p  | 253-260 | 8mer    | -0.11 |
| hsa-miR-26a-2-3p  | 253-260 | 8mer    | -0.10 |
| hsa-miR-6731-3p   | 254-260 | 7mer-1A | -0.02 |
| hsa-miR-587       | 265-271 | 7mer-1A | -0.03 |
| hsa-miR-3124-3p   | 267-273 | 7mer-1A | -0.06 |
| hsa-miR-6830-3p   | 268-275 | 8mer    | -0.09 |
| hsa-miR-511-5p    | 269-276 | 8mer    | -0.03 |
| hsa-miR-143-5p    | 277-284 | 8mer    | -0.12 |
| hsa-miR-3944-5p   | 278-284 | 7mer-1A | -0.02 |
| hsa-miR-1914-5p   | 280-286 | 7mer-m8 | -0.12 |
| hsa-miR-6811-3p   | 281-288 | 8mer    | -0.18 |
| hsa-miR-214-5p    | 282-288 | 7mer-1A | -0.05 |
| hsa-miR-6514-3p   | 282-288 | 7mer-m8 | -0.02 |
| hsa-miR-5001-3p   | 284-290 | 7mer-m8 | -0.06 |
| hsa-miR-4470      | 292-298 | 7mer-m8 | -0.12 |
| hsa-miR-1827      | 295-301 | 7mer-1A | -0.19 |
| hsa-miR-4436b-5p  | 312-318 | 7mer-m8 | -0.07 |
| hsa-miR-665       | 320-326 | 7mer-1A | -0.11 |
| hsa-miR-3912-5p   | 330-336 | 7mer-1A | -0.06 |
| hsa-miR-6500-3p   | 333-339 | 7mer-m8 | -0.02 |
| hsa-miR-383-3p    | 336-342 | 7mer-m8 | -0.09 |
| hsa-miR-4733-5p   | 343-350 | 8mer    | -0.19 |
| hsa-miR-495-5p    | 355-361 | 7mer-1A | -0.01 |

|                 |         |         |       |
|-----------------|---------|---------|-------|
| hsa-miR-382-5p  | 355-361 | 7mer-1A | -0.01 |
| hsa-miR-6507-5p | 360-366 | 7mer-m8 | -0.02 |
| hsa-miR-186-5p  | 361-367 | 7mer-m8 | -0.02 |
| hsa-miR-888-5p  | 365-372 | 8mer    | -0.15 |
| hsa-miR-323a-3p | 370-376 | 7mer-m8 | -0.02 |
| hsa-miR-130a-5p | 372-378 | 7mer-m8 | -0.02 |
| hsa-miR-23b-3p  | 372-378 | 7mer-m8 | -0.02 |
| hsa-miR-23a-3p  | 372-378 | 7mer-m8 | -0.02 |
| hsa-miR-23c     | 372-378 | 7mer-m8 | -0.02 |
| hsa-miR-561-3p  | 389-395 | 7mer-m8 | -0.02 |
| hsa-miR-3973    | 391-397 | 7mer-1A | -0.21 |
| hsa-miR-520h    | 391-397 | 7mer-1A | -0.11 |
| hsa-miR-520g-3p | 391-397 | 7mer-1A | -0.11 |
| hsa-miR-1285-3p | 401-407 | 7mer-m8 | -0.21 |
| hsa-miR-612     | 401-407 | 7mer-m8 | -0.10 |
| hsa-miR-5189-5p | 401-407 | 7mer-m8 | -0.14 |
| hsa-miR-3187-5p | 401-407 | 7mer-m8 | -0.15 |
| hsa-miR-6860    | 401-407 | 7mer-m8 | -0.14 |
| hsa-miR-939-3p  | 402-408 | 7mer-m8 | -0.17 |
| hsa-miR-661     | 403-410 | 8mer    | -0.22 |
| hsa-miR-3116    | 404-410 | 7mer-1A | -0.17 |
| hsa-miR-1254    | 404-410 | 7mer-1A | -0.16 |
| hsa-miR-6876-5p | 418-424 | 7mer-1A | -0.11 |
| hsa-miR-4476    | 418-424 | 7mer-1A | -0.11 |
| hsa-miR-6719-3p | 425-432 | 8mer    | -0.31 |
| hsa-miR-3660    | 426-432 | 7mer-1A | -0.15 |
| hsa-miR-4526    | 426-432 | 7mer-1A | -0.06 |
| hsa-miR-6730-3p | 426-432 | 7mer-1A | -0.05 |
| hsa-miR-4256    | 427-433 | 7mer-1A | -0.10 |
| hsa-miR-26b-3p  | 430-437 | 8mer    | -0.11 |
| hsa-miR-3664-5p | 433-439 | 7mer-m8 | -0.02 |
| hsa-miR-7703    | 436-443 | 8mer    | -0.17 |
| hsa-miR-4325    | 437-443 | 7mer-1A | -0.10 |
| hsa-miR-4507    | 441-447 | 7mer-m8 | -0.06 |
| hsa-miR-3940-5p | 441-447 | 7mer-m8 | -0.02 |
| hsa-miR-134-5p  | 446-453 | 8mer    | -0.11 |
| hsa-miR-3118    | 446-453 | 8mer    | -0.11 |
| hsa-miR-6820-3p | 447-453 | 7mer-1A | -0.01 |

|                  |         |               |       |
|------------------|---------|---------------|-------|
| hsa-miR-3164     | 447-453 | 7mer-1A       | -0.01 |
| hsa-miR-4302     | 450-456 | 7mer-m8       | -0.05 |
| hsa-miR-216a-3p  | 452-458 | 7mer-m8       | -0.03 |
| hsa-miR-128-3p   | 452-458 | 7mer-m8       | -0.02 |
| hsa-miR-3681-3p  | 452-458 | 7mer-m8       | -0.02 |
| hsa-miR-588      | 456-462 | 7mer-m8       | -0.13 |
| hsa-miR-4701-5p  | 456-462 | 7mer-m8       | -0.11 |
| hsa-miR-3190-5p  | 457-463 | 7mer-m8       | -0.08 |
| hsa-miR-892b     | 459-465 | 7mer-1A       | -0.14 |
| hsa-miR-301a-3p  | 467-478 | non-canonical | N/A   |
| hsa-miR-301a-3p  | 467-478 | non-canonical | N/A   |
| hsa-miR-1827     | 475-481 | 7mer-1A       | -0.24 |
| hsa-miR-4517     | 479-485 | 7mer-m8       | -0.02 |
| hsa-miR-338-5p   | 481-487 | 7mer-m8       | -0.02 |
| hsa-miR-5004-5p  | 485-491 | 7mer-m8       | -0.18 |
| hsa-miR-6847-5p  | 487-493 | 7mer-m8       | -0.11 |
| hsa-miR-2467-3p  | 488-495 | 8mer          | -0.27 |
| hsa-miR-3678-3p  | 489-496 | 8mer          | -0.16 |
| hsa-miR-1273h-3p | 490-496 | 7mer-1A       | -0.06 |
| hsa-miR-4327     | 492-498 | 7mer-m8       | -0.15 |
| hsa-miR-100-3p   | 494-500 | 7mer-m8       | -0.05 |
| hsa-miR-451b     | 500-506 | 7mer-m8       | -0.04 |
| hsa-miR-545-3p   | 502-508 | 7mer-1A       | -0.02 |
| hsa-miR-3617-3p  | 503-509 | 7mer-m8       | -0.04 |
| hsa-miR-4772-5p  | 505-511 | 7mer-1A       | -0.14 |
| hsa-miR-383-5p.1 | 505-511 | 7mer-1A       | -0.12 |
| hsa-miR-3192-3p  | 507-513 | 7mer-m8       | -0.04 |
| hsa-miR-3151-3p  | 507-513 | 7mer-1A       | -0.05 |
| hsa-miR-4714-5p  | 509-515 | 7mer-m8       | -0.08 |
| hsa-miR-4680-5p  | 511-517 | 7mer-m8       | -0.03 |
| hsa-miR-3928-3p  | 514-520 | 7mer-m8       | -0.09 |
| hsa-miR-766-5p   | 515-521 | 7mer-m8       | -0.07 |
| hsa-miR-4779     | 517-523 | 7mer-1A       | -0.11 |
| hsa-miR-4266     | 517-523 | 7mer-m8       | -0.13 |
| hsa-miR-4695-5p  | 517-523 | 7mer-1A       | -0.05 |
| hsa-miR-562      | 521-527 | 7mer-1A       | -0.01 |
| hsa-miR-4507     | 528-534 | 7mer-m8       | -0.12 |
| hsa-miR-3940-5p  | 528-534 | 7mer-m8       | -0.08 |

|                  |         |         |       |
|------------------|---------|---------|-------|
| hsa-miR-6742-3p  | 530-536 | 7mer-m8 | -0.09 |
| hsa-miR-6791-5p  | 531-537 | 7mer-m8 | -0.18 |
| hsa-miR-4292     | 531-537 | 7mer-m8 | -0.16 |
| hsa-miR-504-5p.1 | 532-538 | 7mer-m8 | -0.06 |
| hsa-miR-3620-3p  | 533-539 | 7mer-m8 | -0.10 |
| hsa-miR-1228-3p  | 536-542 | 7mer-1A | -0.07 |
| hsa-miR-377-3p   | 537-543 | 7mer-1A | -0.05 |
| hsa-miR-4531     | 548-554 | 7mer-m8 | -0.06 |
| hsa-miR-4434     | 548-554 | 7mer-1A | -0.03 |
| hsa-miR-4516     | 548-554 | 7mer-1A | -0.01 |
| hsa-miR-5703     | 548-554 | 7mer-1A | -0.01 |
| hsa-miR-4694-3p  | 551-557 | 7mer-m8 | -0.02 |
| hsa-miR-4267     | 561-567 | 7mer-1A | -0.22 |
| hsa-miR-6512-3p  | 562-568 | 7mer-1A | -0.15 |
| hsa-miR-6720-5p  | 562-568 | 7mer-1A | -0.10 |
| hsa-miR-6875-3p  | 565-571 | 7mer-m8 | -0.02 |
| hsa-miR-4778-3p  | 566-572 | 7mer-m8 | -0.02 |
| hsa-miR-1178-3p  | 572-578 | 7mer-m8 | -0.18 |
| hsa-miR-767-3p   | 573-579 | 7mer-m8 | -0.10 |
| hsa-miR-200a-3p  | 577-583 | 7mer-m8 | -0.02 |
| hsa-miR-141-3p   | 577-583 | 7mer-m8 | -0.02 |
| hsa-miR-3145-5p  | 582-588 | 7mer-m8 | -0.02 |
| hsa-miR-483-3p.2 | 584-590 | 7mer-1A | -0.05 |
| hsa-miR-552-3p   | 593-599 | 7mer-1A | -0.09 |
| hsa-miR-7151-3p  | 594-600 | 7mer-1A | -0.01 |
| hsa-miR-5095     | 594-600 | 7mer-1A | -0.01 |
| hsa-miR-600      | 595-601 | 7mer-m8 | -0.02 |
| hsa-miR-6747-3p  | 600-606 | 7mer-m8 | -0.02 |
| hsa-miR-4763-5p  | 601-607 | 7mer-m8 | -0.07 |
| hsa-miR-2861     | 603-610 | 8mer    | -0.03 |
| hsa-miR-4790-3p  | 608-614 | 7mer-1A | -0.01 |
| hsa-miR-5187-3p  | 610-616 | 7mer-1A | -0.01 |
| hsa-miR-4680-3p  | 610-616 | 7mer-1A | -0.01 |
| hsa-miR-4427     | 610-616 | 7mer-1A | -0.01 |
| hsa-miR-146a-3p  | 611-617 | 7mer-m8 | -0.02 |
| hsa-miR-7705     | 615-621 | 7mer-m8 | -0.06 |
| hsa-miR-767-5p   | 620-626 | 7mer-m8 | -0.12 |
| hsa-miR-29a-3p   | 621-627 | 7mer-m8 | -0.10 |

|                  |         |         |       |
|------------------|---------|---------|-------|
| hsa-miR-29c-3p   | 621-627 | 7mer-m8 | -0.09 |
| hsa-miR-29b-3p   | 621-627 | 7mer-m8 | -0.09 |
| hsa-miR-634      | 628-634 | 7mer-m8 | -0.02 |
| hsa-miR-1226-3p  | 629-635 | 7mer-m8 | -0.02 |
| hsa-miR-593-5p   | 631-637 | 7mer-m8 | -0.03 |
| hsa-miR-4269     | 633-639 | 7mer-m8 | -0.02 |
| hsa-miR-6715b-5p | 633-639 | 7mer-m8 | -0.02 |
| hsa-miR-7150     | 636-642 | 7mer-m8 | -0.02 |
| hsa-miR-1207-5p  | 636-642 | 7mer-1A | -0.01 |
| hsa-miR-4763-3p  | 636-642 | 7mer-1A | -0.01 |
| hsa-miR-4736     | 636-642 | 7mer-1A | -0.01 |
| hsa-miR-6815-5p  | 639-645 | 7mer-m8 | -0.11 |
| hsa-miR-6865-5p  | 639-645 | 7mer-m8 | -0.11 |
| hsa-miR-493-3p   | 642-648 | 7mer-1A | -0.01 |
| hsa-miR-6126     | 643-649 | 7mer-1A | -0.01 |
| hsa-miR-6864-5p  | 643-649 | 7mer-1A | -0.01 |
| hsa-miR-4635     | 644-650 | 7mer-m8 | -0.02 |
| hsa-miR-198      | 652-658 | 7mer-m8 | -0.03 |
| hsa-miR-4726-3p  | 657-663 | 7mer-m8 | -0.02 |
| hsa-miR-1265     | 668-674 | 7mer-m8 | -0.07 |
| hsa-miR-4642     | 685-691 | 7mer-m8 | -0.16 |
| hsa-miR-4659a-5p | 690-697 | 8mer    | -0.20 |
| hsa-miR-4659b-5p | 690-697 | 8mer    | -0.18 |
| hsa-miR-5590-5p  | 691-697 | 7mer-1A | -0.06 |
| hsa-miR-4776-3p  | 691-697 | 7mer-m8 | -0.02 |
| hsa-miR-6501-5p  | 692-698 | 7mer-m8 | -0.15 |
| hsa-miR-495-5p   | 694-701 | 8mer    | -0.06 |
| hsa-miR-382-5p   | 695-701 | 7mer-1A | -0.01 |
| hsa-miR-520f-5p  | 699-705 | 7mer-1A | -0.02 |
| hsa-miR-3675-3p  | 700-706 | 7mer-m8 | -0.02 |
| hsa-miR-216b-5p  | 701-707 | 7mer-m8 | -0.02 |
| hsa-miR-548c-3p  | 710-716 | 7mer-1A | -0.01 |
| hsa-miR-5093     | 723-729 | 7mer-m8 | -0.03 |
| hsa-miR-4496     | 725-731 | 7mer-1A | -0.01 |
| hsa-miR-8065     | 726-732 | 7mer-m8 | -0.11 |
| hsa-miR-133a-5p  | 730-737 | 8mer    | -0.23 |
| hsa-miR-138-5p   | 731-737 | 7mer-1A | -0.18 |
| hsa-miR-6131     | 731-737 | 7mer-1A | -0.01 |

|                  |         |         |       |
|------------------|---------|---------|-------|
| hsa-miR-1251-3p  | 735-742 | 8mer    | -0.33 |
| hsa-miR-6885-3p  | 738-744 | 7mer-m8 | -0.02 |
| hsa-miR-548aq-5p | 759-765 | 7mer-m8 | -0.02 |
| hsa-miR-559      | 759-765 | 7mer-m8 | -0.02 |
| hsa-miR-548as-5p | 759-765 | 7mer-m8 | -0.02 |
| hsa-miR-548ap-5p | 759-765 | 7mer-m8 | -0.02 |
| hsa-miR-548j-5p  | 759-765 | 7mer-m8 | -0.02 |
| hsa-miR-548h-5p  | 759-765 | 7mer-m8 | -0.02 |
| hsa-miR-548ak    | 759-765 | 7mer-m8 | -0.02 |
| hsa-miR-548ae-5p | 759-765 | 7mer-m8 | -0.02 |
| hsa-miR-548d-5p  | 759-765 | 7mer-m8 | -0.02 |
| hsa-miR-548ay-5p | 759-765 | 7mer-m8 | -0.02 |
| hsa-miR-548c-5p  | 759-765 | 7mer-m8 | -0.02 |
| hsa-miR-548am-5p | 759-765 | 7mer-m8 | -0.02 |
| hsa-miR-548w     | 759-765 | 7mer-m8 | -0.02 |
| hsa-miR-548b-5p  | 759-765 | 7mer-m8 | -0.02 |
| hsa-miR-548o-5p  | 759-765 | 7mer-m8 | -0.02 |
| hsa-miR-548bb-5p | 759-765 | 7mer-m8 | -0.02 |
| hsa-miR-548ad-5p | 759-765 | 7mer-m8 | -0.02 |
| hsa-miR-548au-5p | 759-765 | 7mer-m8 | -0.02 |
| hsa-miR-548y     | 759-765 | 7mer-m8 | -0.02 |
| hsa-miR-548i     | 759-765 | 7mer-m8 | -0.02 |
| hsa-miR-548a-5p  | 759-765 | 7mer-m8 | -0.02 |
| hsa-miR-548ab    | 759-765 | 7mer-m8 | -0.02 |
| hsa-miR-548ar-5p | 759-765 | 7mer-m8 | -0.02 |
| hsa-miR-548n     | 760-766 | 7mer-m8 | -0.02 |
| hsa-miR-510-3p   | 770-777 | 8mer    | -0.03 |
| hsa-miR-34c-3p   | 777-783 | 7mer-1A | -0.14 |
| hsa-miR-7159-3p  | 781-787 | 7mer-1A | -0.01 |
| hsa-miR-4482-3p  | 781-787 | 7mer-1A | -0.01 |
| hsa-miR-627-3p   | 783-789 | 7mer-m8 | -0.02 |
| hsa-miR-5003-3p  | 784-790 | 7mer-m8 | -0.02 |
| hsa-miR-216b-3p  | 787-793 | 7mer-m8 | -0.10 |
| hsa-miR-449b-3p  | 790-796 | 7mer-m8 | -0.13 |
| hsa-miR-365a-3p  | 798-804 | 7mer-m8 | -0.16 |
| hsa-miR-365b-3p  | 798-804 | 7mer-m8 | -0.16 |
| hsa-miR-130b-5p  | 805-811 | 7mer-m8 | -0.07 |
| hsa-miR-6800-3p  | 808-814 | 7mer-1A | -0.10 |



|                  |         |         |       |
|------------------|---------|---------|-------|
| hsa-miR-4777-3p  | 809-815 | 7mer-1A | -0.27 |
| hsa-miR-2681-5p  | 811-817 | 7mer-m8 | -0.02 |
| hsa-miR-590-3p   | 813-819 | 7mer-m8 | -0.02 |
| hsa-miR-3123     | 817-824 | 8mer    | -0.11 |
| hsa-miR-3925-5p  | 818-824 | 7mer-1A | -0.01 |
| hsa-miR-519a-5p  | 820-826 | 7mer-m8 | -0.17 |
| hsa-miR-518e-5p  | 820-826 | 7mer-m8 | -0.17 |
| hsa-miR-523-5p   | 820-826 | 7mer-m8 | -0.17 |
| hsa-miR-519c-5p  | 820-826 | 7mer-m8 | -0.17 |
| hsa-miR-522-5p   | 820-826 | 7mer-m8 | -0.17 |
| hsa-miR-519b-5p  | 820-826 | 7mer-m8 | -0.17 |
| hsa-miR-518f-5p  | 820-826 | 7mer-m8 | -0.17 |
| hsa-miR-526a     | 820-826 | 7mer-m8 | -0.17 |
| hsa-miR-518d-5p  | 820-826 | 7mer-m8 | -0.17 |
| hsa-miR-520c-5p  | 820-826 | 7mer-m8 | -0.17 |
| hsa-miR-520g-5p  | 820-826 | 7mer-1A | -0.13 |
| hsa-miR-4759     | 832-839 | 8mer    | -0.33 |
| hsa-miR-3117-3p  | 833-840 | 8mer    | -0.42 |
| hsa-miR-8083     | 833-839 | 7mer-1A | -0.15 |
| hsa-miR-3169     | 833-839 | 7mer-1A | -0.11 |
| hsa-miR-183-3p   | 838-845 | 8mer    | -0.03 |
| hsa-miR-4452     | 839-845 | 7mer-1A | -0.01 |
| hsa-miR-3159     | 844-850 | 7mer-1A | -0.06 |
| hsa-miR-548n     | 849-855 | 7mer-m8 | -0.02 |
| hsa-miR-4694-5p  | 858-864 | 7mer-1A | -0.17 |
| hsa-miR-153-5p   | 864-871 | 8mer    | -0.03 |
| hsa-miR-1250-3p  | 865-871 | 7mer-1A | -0.01 |
| hsa-miR-3163     | 885-891 | 7mer-m8 | -0.02 |
| hsa-miR-577      | 887-893 | 7mer-m8 | -0.08 |
| hsa-miR-4662a-3p | 889-895 | 7mer-1A | -0.12 |
| hsa-miR-539-5p   | 897-903 | 7mer-1A | -0.01 |
| hsa-miR-580-3p   | 898-904 | 7mer-1A | -0.07 |
| hsa-miR-4461     | 899-905 | 7mer-m8 | -0.07 |
| hsa-miR-5186     | 902-908 | 7mer-m8 | -0.17 |
| hsa-miR-6888-5p  | 904-910 | 7mer-m8 | -0.13 |
| hsa-miR-3150b-3p | 905-911 | 7mer-m8 | -0.19 |
| hsa-miR-4784     | 905-911 | 7mer-m8 | -0.18 |
| hsa-miR-6758-5p  | 908-914 | 7mer-m8 | -0.16 |

|                 |         |         |       |
|-----------------|---------|---------|-------|
| hsa-miR-6856-5p | 908-914 | 7mer-m8 | -0.15 |
| hsa-miR-4311    | 912-918 | 7mer-m8 | -0.02 |
| hsa-miR-766-5p  | 917-924 | 8mer    | -0.15 |
| hsa-miR-6894-5p | 918-924 | 7mer-1A | -0.16 |
| hsa-miR-7154-3p | 918-924 | 7mer-1A | -0.10 |
| hsa-miR-765     | 918-924 | 7mer-1A | -0.14 |
| hsa-miR-7847-3p | 919-925 | 7mer-m8 | -0.26 |
| hsa-miR-6880-5p | 920-926 | 7mer-m8 | -0.22 |
| hsa-miR-363-5p  | 921-928 | 8mer    | -0.30 |
| hsa-miR-6745    | 921-928 | 8mer    | -0.28 |
| hsa-miR-1293    | 922-928 | 7mer-1A | -0.18 |
| hsa-miR-4483    | 922-928 | 7mer-1A | -0.06 |
| hsa-miR-6766-5p | 922-928 | 7mer-1A | -0.16 |
| hsa-miR-6756-5p | 922-928 | 7mer-1A | -0.17 |
| hsa-miR-3115    | 924-931 | 8mer    | -0.29 |
| hsa-miR-4795-3p | 928-934 | 7mer-1A | -0.01 |
| hsa-miR-6809-3p | 933-939 | 7mer-m8 | -0.02 |
| hsa-miR-4753-3p | 933-939 | 7mer-1A | -0.01 |
| hsa-miR-543     | 937-943 | 7mer-m8 | -0.02 |
| hsa-miR-3914    | 941-947 | 7mer-1A | -0.04 |
| hsa-miR-8065    | 942-948 | 7mer-m8 | -0.09 |
| hsa-miR-6869-5p | 945-951 | 7mer-m8 | -0.02 |
| hsa-miR-595     | 950-956 | 7mer-m8 | -0.03 |
| hsa-miR-573     | 952-958 | 7mer-m8 | -0.08 |
| hsa-miR-4795-5p | 952-958 | 7mer-1A | -0.08 |
| hsa-miR-3616-5p | 952-958 | 7mer-m8 | -0.05 |
| hsa-miR-1180-5p | 961-967 | 7mer-1A | -0.01 |
| hsa-miR-7114-3p | 961-967 | 7mer-1A | -0.01 |
| hsa-miR-7973    | 962-969 | 8mer    | -0.25 |
| hsa-miR-6808-3p | 963-969 | 7mer-m8 | -0.02 |
| hsa-miR-4501    | 964-970 | 7mer-m8 | -0.04 |
| hsa-miR-4764-5p | 966-973 | 8mer    | -0.12 |
| hsa-miR-3134    | 969-975 | 7mer-m8 | -0.04 |
| hsa-miR-6757-5p | 972-978 | 7mer-m8 | -0.13 |
| hsa-miR-1249-5p | 974-981 | 8mer    | -0.27 |
| hsa-miR-6797-5p | 974-981 | 8mer    | -0.25 |
| hsa-miR-6515-5p | 975-981 | 7mer-m8 | -0.25 |
| hsa-miR-4802-5p | 976-982 | 7mer-m8 | -0.18 |

|                  |           |               |       |
|------------------|-----------|---------------|-------|
| hsa-miR-4790-3p  | 979-985   | 7mer-1A       | -0.12 |
| hsa-miR-4533     | 986-993   | 8mer          | -0.16 |
| hsa-miR-3202     | 987-993   | 7mer-1A       | -0.11 |
| hsa-miR-432-3p   | 991-997   | 7mer-m8       | -0.23 |
| hsa-miR-3134     | 993-999   | 7mer-m8       | -0.15 |
| hsa-miR-4662b    | 995-1001  | 7mer-m8       | -0.12 |
| hsa-miR-4647     | 995-1001  | 7mer-m8       | -0.06 |
| hsa-miR-4426     | 995-1001  | 7mer-m8       | -0.03 |
| hsa-miR-3978     | 999-1005  | 7mer-m8       | -0.05 |
| hsa-miR-3688-3p  | 1000-1006 | 7mer-m8       | -0.02 |
| hsa-miR-4802-3p  | 1000-1011 | non-canonical | N/A   |
| hsa-miR-4802-3p  | 1000-1011 | non-canonical | N/A   |
| hsa-miR-432-3p   | 1003-1009 | 7mer-m8       | -0.25 |
| hsa-miR-3689d    | 1012-1018 | 7mer-1A       | -0.21 |
| hsa-miR-6851-5p  | 1012-1018 | 7mer-1A       | -0.28 |
| hsa-miR-4802-5p  | 1013-1019 | 7mer-m8       | -0.21 |
| hsa-miR-8082     | 1014-1020 | 7mer-m8       | -0.18 |
| hsa-miR-4534     | 1014-1020 | 7mer-m8       | -0.11 |
| hsa-miR-432-3p   | 1016-1022 | 7mer-m8       | -0.22 |
| hsa-miR-3134     | 1018-1024 | 7mer-m8       | -0.11 |
| hsa-miR-2392     | 1020-1026 | 7mer-m8       | -0.28 |
| hsa-miR-4533     | 1023-1030 | 8mer          | -0.19 |
| hsa-miR-3202     | 1024-1030 | 7mer-1A       | -0.12 |
| hsa-miR-6079     | 1025-1031 | 7mer-1A       | -0.03 |
| hsa-miR-4781-3p  | 1028-1035 | 8mer          | -0.23 |
| hsa-miR-1277-5p  | 1033-1039 | 7mer-m8       | -0.02 |
| hsa-miR-95-5p    | 1038-1045 | 8mer          | -0.03 |
| hsa-miR-888-5p   | 1042-1048 | 7mer-1A       | -0.15 |
| hsa-miR-221-5p   | 1058-1064 | 7mer-m8       | -0.04 |
| hsa-miR-8073     | 1058-1064 | 7mer-m8       | -0.02 |
| hsa-miR-331-3p   | 1060-1066 | 7mer-m8       | -0.02 |
| hsa-miR-210-5p   | 1061-1067 | 7mer-m8       | -0.08 |
| hsa-miR-6769a-3p | 1062-1068 | 7mer-m8       | -0.02 |
| hsa-miR-1226-3p  | 1066-1072 | 7mer-m8       | -0.02 |
| hsa-miR-1260a    | 1069-1075 | 7mer-m8       | -0.06 |
| hsa-miR-1260b    | 1069-1075 | 7mer-m8       | -0.06 |
| hsa-miR-1224-3p  | 1069-1075 | 7mer-1A       | -0.03 |
| hsa-miR-4433a-5p | 1070-1077 | 8mer          | -0.16 |

|                    |           |         |       |
|--------------------|-----------|---------|-------|
| hsa-miR-4433b-5p   | 1071-1077 | 7mer-m8 | -0.02 |
| hsa-miR-6760-3p    | 1074-1080 | 7mer-m8 | -0.02 |
| hsa-miR-197-3p     | 1078-1084 | 7mer-m8 | -0.10 |
| hsa-miR-6879-3p    | 1080-1086 | 7mer-1A | -0.01 |
| hsa-miR-4632-5p    | 1093-1099 | 7mer-m8 | -0.07 |
| hsa-miR-6879-5p    | 1093-1099 | 7mer-m8 | -0.10 |
| hsa-miR-4436b-3p   | 1093-1099 | 7mer-m8 | -0.10 |
| hsa-miR-6735-5p    | 1093-1099 | 7mer-m8 | -0.09 |
| hsa-miR-7843-5p    | 1093-1099 | 7mer-m8 | -0.05 |
| hsa-miR-3616-3p    | 1094-1101 | 8mer    | -0.23 |
| hsa-miR-1226-5p    | 1095-1101 | 7mer-m8 | -0.15 |
| hsa-miR-4721       | 1095-1101 | 7mer-1A | -0.11 |
| hsa-miR-618        | 1102-1108 | 7mer-m8 | -0.02 |
| hsa-miR-4305       | 1112-1118 | 7mer-m8 | -0.08 |
| hsa-miR-670-3p     | 1119-1125 | 7mer-m8 | -0.02 |
| hsa-miR-6740-3p    | 1123-1129 | 7mer-1A | -0.03 |
| hsa-miR-511-5p     | 1124-1130 | 7mer-1A | -0.01 |
| hsa-miR-548c-3p    | 1133-1139 | 7mer-1A | -0.01 |
| hsa-miR-513a-3p    | 1146-1152 | 7mer-1A | -0.01 |
| hsa-miR-3606-3p    | 1146-1152 | 7mer-1A | -0.01 |
| hsa-miR-513c-3p    | 1146-1152 | 7mer-1A | -0.01 |
| hsa-miR-561-3p     | 1160-1166 | 7mer-m8 | -0.02 |
| hsa-miR-4504       | 1169-1176 | 8mer    | -0.15 |
| hsa-miR-542-3p     | 1170-1176 | 7mer-1A | -0.05 |
| hsa-miR-758-3p     | 1171-1177 | 7mer-m8 | -0.10 |
| hsa-miR-6808-3p    | 1171-1177 | 7mer-1A | -0.01 |
| hsa-miR-6500-3p    | 1174-1180 | 7mer-m8 | -0.02 |
| hsa-miR-1255b-2-3p | 1176-1182 | 7mer-m8 | -0.03 |
| hsa-miR-3591-3p    | 1179-1185 | 7mer-m8 | -0.11 |
| hsa-miR-21-3p      | 1179-1185 | 7mer-m8 | -0.09 |
| hsa-miR-95-5p      | 1184-1190 | 7mer-m8 | -0.02 |
| hsa-miR-106a-3p    | 1187-1193 | 7mer-1A | -0.13 |
| hsa-miR-363-3p     | 1189-1195 | 7mer-1A | -0.12 |
| hsa-miR-92b-3p     | 1189-1195 | 7mer-1A | -0.07 |
| hsa-miR-367-3p     | 1189-1195 | 7mer-1A | -0.10 |
| hsa-miR-92a-3p     | 1189-1195 | 7mer-1A | -0.07 |
| hsa-miR-25-3p      | 1189-1195 | 7mer-1A | -0.07 |
| hsa-miR-32-5p      | 1189-1195 | 7mer-1A | -0.06 |

|                  |           |         |       |
|------------------|-----------|---------|-------|
| hsa-miR-137      | 1190-1196 | 7mer-1A | -0.08 |
| hsa-miR-6715a-3p | 1202-1208 | 7mer-m8 | -0.02 |
| hsa-miR-527      | 1205-1211 | 7mer-1A | -0.01 |
| hsa-miR-518a-5p  | 1205-1211 | 7mer-1A | -0.01 |
| hsa-miR-548aw    | 1205-1211 | 7mer-1A | -0.01 |
| hsa-miR-4684-3p  | 1206-1212 | 7mer-m8 | -0.06 |
| hsa-miR-377-5p   | 1209-1215 | 7mer-m8 | -0.06 |
| hsa-miR-6086     | 1209-1215 | 7mer-m8 | -0.02 |
| hsa-miR-583      | 1212-1218 | 7mer-m8 | -0.03 |
| hsa-miR-1267     | 1221-1228 | 8mer    | -0.09 |
| hsa-miR-367-5p   | 1222-1228 | 7mer-1A | -0.03 |
| hsa-miR-4652-3p  | 1223-1229 | 7mer-m8 | -0.02 |
| hsa-miR-5580-3p  | 1230-1236 | 7mer-m8 | -0.05 |
| hsa-miR-193a-5p  | 1240-1246 | 7mer-m8 | -0.12 |
| hsa-miR-1182     | 1241-1247 | 7mer-m8 | -0.02 |
| hsa-miR-6883-5p  | 1244-1251 | 8mer    | -0.13 |
| hsa-miR-149-3p   | 1244-1251 | 8mer    | -0.13 |
| hsa-miR-4728-5p  | 1244-1251 | 8mer    | -0.13 |
| hsa-miR-6785-5p  | 1244-1251 | 8mer    | -0.11 |
| hsa-miR-7106-5p  | 1245-1251 | 7mer-1A | -0.04 |
| hsa-miR-6799-5p  | 1245-1251 | 7mer-1A | -0.01 |
| hsa-miR-3689a-3p | 1245-1251 | 7mer-m8 | -0.02 |
| hsa-miR-6779-5p  | 1245-1251 | 7mer-m8 | -0.02 |
| hsa-miR-30b-3p   | 1245-1251 | 7mer-m8 | -0.02 |
| hsa-miR-3689b-3p | 1245-1251 | 7mer-m8 | -0.02 |
| hsa-miR-3689c    | 1245-1251 | 7mer-m8 | -0.02 |
| hsa-miR-1273h-5p | 1245-1251 | 7mer-m8 | -0.02 |
| hsa-miR-6780a-5p | 1245-1251 | 7mer-m8 | -0.02 |
| hsa-miR-6871-5p  | 1246-1252 | 7mer-m8 | -0.02 |
| hsa-miR-4313     | 1253-1259 | 7mer-1A | -0.12 |
| hsa-miR-371b-3p  | 1255-1261 | 7mer-m8 | -0.14 |
| hsa-miR-6513-3p  | 1258-1264 | 7mer-1A | -0.01 |
| hsa-miR-1323     | 1264-1270 | 7mer-m8 | -0.02 |
| hsa-miR-548o-3p  | 1264-1270 | 7mer-m8 | -0.02 |
| hsa-miR-192-3p   | 1268-1274 | 7mer-1A | -0.06 |
| hsa-miR-1915-5p  | 1270-1276 | 7mer-m8 | -0.16 |
| hsa-miR-6773-3p  | 1278-1284 | 7mer-1A | -0.01 |
| hsa-miR-215-3p   | 1278-1284 | 7mer-1A | -0.01 |

|                   |           |         |       |
|-------------------|-----------|---------|-------|
| hsa-miR-1912      | 1287-1293 | 7mer-m8 | -0.03 |
| hsa-miR-1295b-5p  | 1287-1293 | 7mer-m8 | -0.02 |
| hsa-miR-203a-3p.1 | 1299-1305 | 7mer-m8 | -0.02 |
| hsa-miR-5680      | 1300-1306 | 7mer-m8 | -0.02 |
| hsa-miR-527       | 1305-1311 | 7mer-m8 | -0.08 |
| hsa-miR-518a-5p   | 1305-1311 | 7mer-m8 | -0.08 |
| hsa-miR-1-3p      | 1310-1316 | 7mer-1A | -0.08 |
| hsa-miR-206       | 1310-1316 | 7mer-1A | -0.04 |
| hsa-miR-613       | 1310-1316 | 7mer-1A | -0.04 |
| hsa-miR-6128      | 1311-1317 | 7mer-m8 | -0.02 |
| hsa-miR-1207-3p   | 1314-1320 | 7mer-m8 | -0.22 |
| hsa-miR-2277-3p   | 1317-1323 | 7mer-1A | -0.15 |
| hsa-miR-542-3p    | 1318-1324 | 7mer-m8 | -0.10 |
| hsa-miR-1236-5p   | 1320-1326 | 7mer-m8 | -0.20 |
| hsa-miR-5586-3p   | 1321-1327 | 7mer-m8 | -0.07 |
| hsa-miR-759       | 1322-1328 | 7mer-m8 | -0.05 |
| hsa-miR-4797-5p   | 1323-1329 | 7mer-m8 | -0.02 |
| hsa-miR-5582-5p   | 1327-1333 | 7mer-m8 | -0.15 |
| hsa-miR-124-3p.1  | 1328-1334 | 7mer-m8 | -0.22 |
| hsa-miR-548an     | 1329-1335 | 7mer-m8 | -0.03 |
| hsa-miR-3674      | 1335-1341 | 7mer-m8 | -0.07 |
| hsa-miR-106a-3p   | 1345-1351 | 7mer-1A | -0.01 |
| hsa-miR-4684-3p   | 1346-1353 | 8mer    | -0.19 |
| hsa-miR-367-5p    | 1348-1355 | 8mer    | -0.22 |
| hsa-miR-1267      | 1349-1355 | 7mer-1A | -0.07 |
| hsa-miR-622       | 1352-1358 | 7mer-m8 | -0.12 |
| hsa-miR-212-3p    | 1354-1360 | 7mer-m8 | -0.09 |
| hsa-miR-132-3p    | 1354-1360 | 7mer-m8 | -0.08 |
| hsa-miR-4709-5p   | 1355-1362 | 8mer    | -0.11 |
| hsa-miR-421       | 1356-1362 | 7mer-m8 | -0.07 |
| hsa-miR-6750-3p   | 1360-1366 | 7mer-1A | -0.02 |
| hsa-miR-487a-3p   | 1365-1371 | 7mer-1A | -0.04 |
| hsa-miR-154-3p    | 1365-1371 | 7mer-1A | -0.01 |
| hsa-miR-4694-5p   | 1370-1377 | 8mer    | -0.22 |
| hsa-miR-7978      | 1372-1378 | 7mer-m8 | -0.18 |
| hsa-miR-3156-3p   | 1377-1384 | 8mer    | -0.25 |
| hsa-miR-4301      | 1377-1383 | 7mer-1A | -0.11 |
| hsa-miR-188-3p    | 1378-1384 | 7mer-1A | -0.16 |

|                  |           |         |       |
|------------------|-----------|---------|-------|
| hsa-miR-1260a    | 1378-1384 | 7mer-1A | -0.06 |
| hsa-miR-1260b    | 1378-1384 | 7mer-1A | -0.06 |
| hsa-miR-338-3p   | 1386-1392 | 7mer-1A | -0.02 |
| hsa-miR-4530     | 1386-1392 | 7mer-1A | -0.02 |
| hsa-miR-766-3p   | 1387-1393 | 7mer-m8 | -0.14 |
| hsa-miR-6792-3p  | 1389-1396 | 8mer    | -0.13 |
| hsa-miR-4691-5p  | 1389-1396 | 8mer    | -0.03 |
| hsa-miR-6749-3p  | 1390-1396 | 7mer-1A | -0.03 |
| hsa-miR-4326     | 1391-1397 | 7mer-m8 | -0.10 |
| hsa-miR-218-1-3p | 1393-1399 | 7mer-m8 | -0.13 |
| hsa-miR-29b-1-5p | 1395-1401 | 7mer-1A | -0.01 |
| hsa-miR-6824-3p  | 1396-1402 | 7mer-m8 | -0.06 |
| hsa-miR-6764-3p  | 1396-1402 | 7mer-m8 | -0.06 |
| hsa-miR-2682-3p  | 1399-1405 | 7mer-1A | -0.08 |
| hsa-miR-6781-3p  | 1399-1405 | 7mer-1A | -0.06 |
| hsa-miR-519e-3p  | 1401-1407 | 7mer-m8 | -0.12 |
| hsa-miR-33b-3p   | 1401-1407 | 7mer-m8 | -0.12 |
| hsa-miR-515-3p   | 1401-1407 | 7mer-m8 | -0.07 |
| hsa-miR-3190-3p  | 1406-1412 | 7mer-m8 | -0.07 |
| hsa-miR-4761-5p  | 1410-1416 | 7mer-m8 | -0.09 |
| hsa-miR-7977     | 1417-1424 | 8mer    | -0.13 |
| hsa-miR-767-5p   | 1429-1435 | 7mer-m8 | -0.15 |
| hsa-miR-29a-3p   | 1430-1436 | 7mer-m8 | -0.09 |
| hsa-miR-29c-3p   | 1430-1436 | 7mer-m8 | -0.09 |
| hsa-miR-29b-3p   | 1430-1436 | 7mer-m8 | -0.09 |
| hsa-miR-3065-3p  | 1431-1437 | 7mer-m8 | -0.16 |
| hsa-miR-3714     | 1435-1441 | 7mer-m8 | -0.02 |
| hsa-miR-4708-3p  | 1437-1443 | 7mer-m8 | -0.20 |
| hsa-miR-651-3p   | 1451-1457 | 7mer-m8 | -0.02 |
| hsa-miR-6830-5p  | 1452-1458 | 7mer-m8 | -0.09 |
| hsa-miR-4668-3p  | 1458-1464 | 7mer-m8 | -0.02 |
| hsa-miR-873-5p.1 | 1463-1469 | 7mer-1A | -0.06 |
| hsa-miR-548ac    | 1474-1480 | 7mer-1A | -0.01 |
| hsa-miR-548z     | 1474-1480 | 7mer-1A | -0.01 |
| hsa-miR-548bb-3p | 1474-1480 | 7mer-1A | -0.01 |
| hsa-miR-548d-3p  | 1474-1480 | 7mer-1A | -0.01 |
| hsa-miR-548h-3p  | 1474-1480 | 7mer-1A | -0.01 |
| hsa-miR-548ah-3p | 1474-1480 | 7mer-1A | -0.01 |

|                  |           |         |       |
|------------------|-----------|---------|-------|
| hsa-miR-548am-3p | 1474-1480 | 7mer-1A | -0.01 |
| hsa-miR-548j-3p  | 1474-1480 | 7mer-1A | -0.01 |
| hsa-miR-548ae-3p | 1474-1480 | 7mer-1A | -0.01 |
| hsa-miR-548aq-3p | 1474-1480 | 7mer-1A | -0.01 |
| hsa-miR-548aj-3p | 1474-1480 | 7mer-1A | -0.01 |
| hsa-miR-548x-3p  | 1474-1480 | 7mer-1A | -0.01 |
| hsa-miR-4677-5p  | 1485-1492 | 8mer    | -0.28 |
| hsa-miR-2116-5p  | 1485-1491 | 7mer-1A | -0.09 |
| hsa-miR-22-5p    | 1485-1491 | 7mer-1A | -0.10 |
| hsa-miR-6739-3p  | 1486-1492 | 7mer-m8 | -0.20 |
| hsa-miR-4273     | 1486-1492 | 7mer-1A | -0.04 |
| hsa-miR-7156-5p  | 1486-1492 | 7mer-1A | -0.04 |
| hsa-miR-7849-3p  | 1490-1496 | 7mer-m8 | -0.15 |
| hsa-miR-4645-5p  | 1501-1507 | 7mer-m8 | -0.16 |
| hsa-miR-4673     | 1501-1507 | 7mer-m8 | -0.12 |
| hsa-miR-6846-3p  | 1506-1512 | 7mer-1A | -0.16 |
| hsa-miR-6859-3p  | 1506-1512 | 7mer-1A | -0.10 |
| hsa-miR-4750-3p  | 1507-1513 | 7mer-m8 | -0.21 |
| hsa-miR-4738-3p  | 1511-1517 | 7mer-m8 | -0.02 |
| hsa-miR-2115-3p  | 1515-1521 | 7mer-m8 | -0.02 |
| hsa-miR-551b-5p  | 1518-1524 | 7mer-1A | -0.01 |
| hsa-miR-181c-3p  | 1542-1548 | 7mer-1A | -0.19 |
| hsa-miR-1263     | 1545-1552 | 8mer    | -0.43 |
| hsa-miR-150-3p   | 1546-1552 | 7mer-1A | -0.15 |
| hsa-miR-9-5p     | 1548-1554 | 7mer-m8 | -0.12 |
| hsa-miR-885-5p   | 1554-1561 | 8mer    | -0.39 |
| hsa-miR-587      | 1557-1563 | 7mer-1A | -0.07 |
| hsa-miR-664b-3p  | 1561-1567 | 7mer-1A | -0.01 |
| hsa-miR-579-3p   | 1561-1567 | 7mer-1A | -0.01 |
| hsa-miR-5696     | 1561-1567 | 7mer-1A | -0.01 |
| hsa-miR-335-3p   | 1563-1569 | 7mer-m8 | -0.02 |
| hsa-miR-1250-3p  | 1565-1571 | 7mer-m8 | -0.02 |
| hsa-miR-1256     | 1568-1574 | 7mer-1A | -0.17 |
| hsa-miR-3688-5p  | 1570-1576 | 7mer-1A | -0.26 |
| hsa-miR-891a-3p  | 1570-1576 | 7mer-1A | -0.12 |
| hsa-miR-7114-5p  | 1572-1578 | 7mer-1A | -0.07 |
| hsa-miR-134-3p   | 1572-1578 | 7mer-1A | -0.07 |
| hsa-miR-4743-3p  | 1574-1580 | 7mer-1A | -0.01 |



|                  |           |         |       |
|------------------|-----------|---------|-------|
| hsa-miR-4652-3p  | 1574-1580 | 7mer-1A | -0.01 |
| hsa-miR-5590-5p  | 1580-1586 | 7mer-1A | -0.13 |
| hsa-miR-4659a-5p | 1580-1586 | 7mer-1A | -0.11 |
| hsa-miR-4776-3p  | 1580-1586 | 7mer-m8 | -0.10 |
| hsa-miR-4659b-5p | 1580-1586 | 7mer-1A | -0.09 |
| hsa-miR-5684     | 1593-1599 | 7mer-m8 | -0.11 |
| hsa-miR-618      | 1594-1601 | 8mer    | -0.05 |
| hsa-miR-4699-5p  | 1604-1610 | 7mer-1A | -0.01 |
| hsa-miR-8059     | 1610-1617 | 8mer    | -0.19 |
| hsa-miR-4471     | 1610-1617 | 8mer    | -0.23 |
| hsa-miR-1292-5p  | 1611-1617 | 7mer-1A | -0.11 |
| hsa-miR-4795-5p  | 1615-1621 | 7mer-m8 | -0.10 |
| hsa-miR-3934-3p  | 1621-1627 | 7mer-1A | -0.07 |
| hsa-miR-4662b    | 1626-1632 | 7mer-1A | -0.05 |
| hsa-miR-4426     | 1626-1632 | 7mer-1A | -0.01 |
| hsa-miR-4647     | 1626-1632 | 7mer-1A | -0.01 |
| hsa-miR-548ao-5p | 1630-1636 | 7mer-m8 | -0.02 |
| hsa-miR-548ax    | 1630-1636 | 7mer-m8 | -0.02 |
| hsa-miR-4649-5p  | 1635-1641 | 7mer-1A | -0.28 |
| hsa-miR-6729-5p  | 1635-1641 | 7mer-1A | -0.27 |
| hsa-miR-1-3p     | 1640-1646 | 7mer-1A | -0.09 |
| hsa-miR-206      | 1640-1646 | 7mer-1A | -0.08 |
| hsa-miR-613      | 1640-1646 | 7mer-1A | -0.02 |
| hsa-miR-6505-5p  | 1641-1647 | 7mer-1A | -0.10 |
| hsa-miR-92a-1-5p | 1644-1650 | 7mer-1A | -0.16 |
| hsa-miR-758-5p   | 1645-1652 | 8mer    | -0.12 |
| hsa-miR-584-5p   | 1646-1652 | 7mer-m8 | -0.10 |
| hsa-miR-218-2-3p | 1646-1652 | 7mer-1A | -0.03 |
| hsa-miR-486-5p   | 1651-1657 | 7mer-1A | -0.07 |
| hsa-miR-2277-3p  | 1666-1672 | 7mer-1A | -0.16 |
| hsa-miR-6758-3p  | 1672-1678 | 7mer-1A | -0.01 |
| hsa-miR-216a-5p  | 1674-1680 | 7mer-m8 | -0.14 |
| hsa-miR-548c-3p  | 1677-1684 | 8mer    | -0.03 |
| hsa-miR-935      | 1692-1698 | 7mer-1A | -0.04 |
| hsa-miR-4711-5p  | 1695-1701 | 7mer-m8 | -0.24 |
| hsa-miR-5197-3p  | 1704-1710 | 7mer-1A | -0.04 |
| hsa-miR-491-3p   | 1712-1718 | 7mer-1A | -0.12 |
| hsa-miR-4429     | 1718-1724 | 7mer-1A | -0.13 |

|              |           |         |       |
|--------------|-----------|---------|-------|
| hsa-miR-320b | 1718-1724 | 7mer-1A | -0.13 |
| hsa-miR-320a | 1718-1724 | 7mer-1A | -0.13 |
| hsa-miR-320c | 1718-1724 | 7mer-1A | -0.13 |
| hsa-miR-320d | 1718-1724 | 7mer-1A | -0.13 |
| hsa-miR-9-3p | 1718-1724 | 7mer-m8 | -0.14 |

miR/miRNA, microRNA; UTR, untranslated region; LAMC2, laminin subunit  $\gamma 2$ . Context<sup>++</sup> score, the sum of the contribution of 14 features for a specific site (50).
